# Supplementary material for: Case report of a pseudo‐isodicentric chromosome 9 resulting in mosaic trisomy 9
Source: PubMed Central journal article supplement (PMC8077311; doi:10.1002/ccr3.4031), 2021-03-09

# Growth Chart: United States

## Weight-for-age Percentiles (Girls, 2 to 20 years)

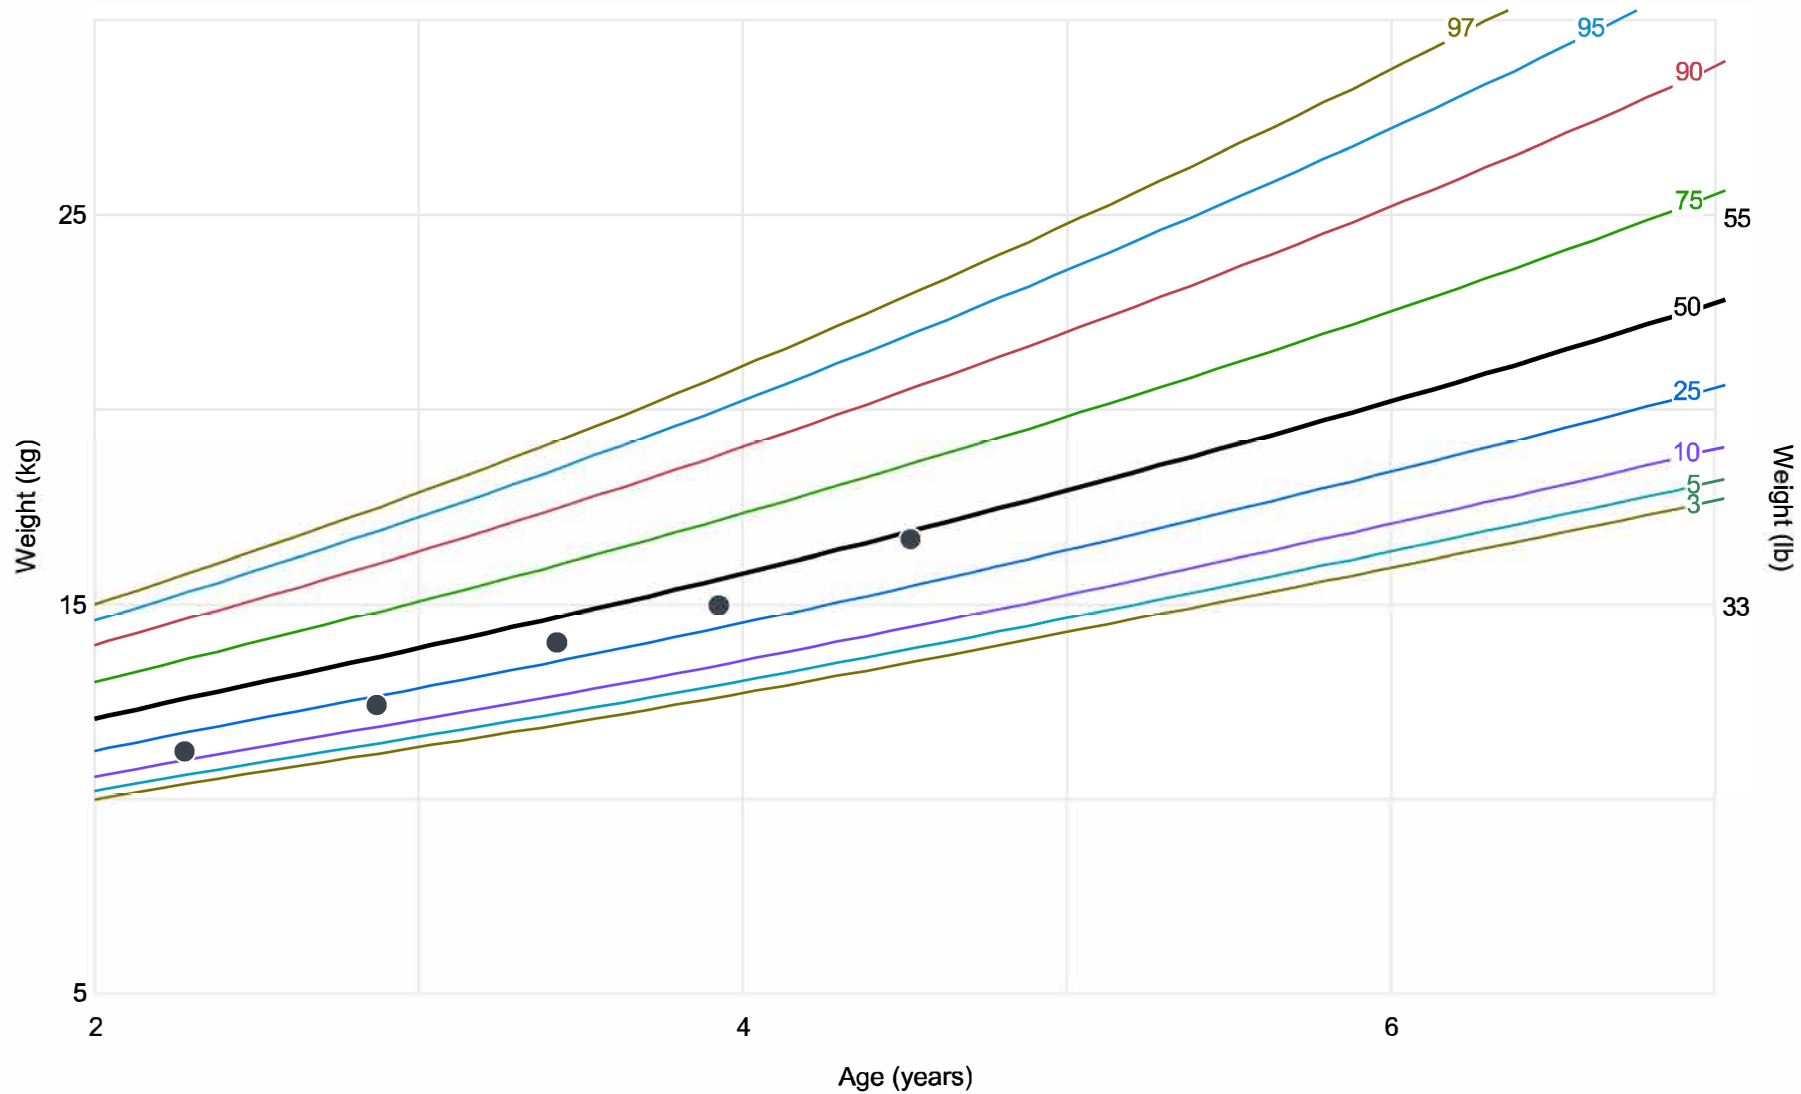

Supplement: CCR3-9-2340-s001.pdf [file CCR3-9-2340-s001.pdf]
